# Supplementary material for: Development of a size exclusion chromatography cartridge-based analytical method for determination of free drug in nano-liposomal oncology drug formulations
Source: Royal Society of Chemistry journal article supplement (doi:10.1039/d4ay02124j), 2025-01-01
Supplement: d4ay02124j1.pdf [file d4ay02124j1.pdf]

## Supplementary Material for

### Development of a Size Exclusion Chromatography Cartridge-Based Analytical Method for Determination of Free Drug in Nano-liposomal Oncology Drug Formulations

Wei Zhang<sup>1\*</sup>, Mark Paciolla<sup>1</sup>, Lijun Duan<sup>1</sup>, Elise Bradley<sup>1</sup>, Aastha Chadha<sup>2</sup>, Bhavesh Barot<sup>2</sup>, Kaylee Worrell<sup>3</sup>

<sup>1</sup>*Analytical Research and Development, Technical Operations, Mirati Therapeutics, 3545 Cray Court, San Diego, CA 92121, USA*

<sup>2</sup>*Product Development, Technical Operations, Mirati Therapeutics, 3545 Cray Court, San Diego, CA 92121, USA*

<sup>3</sup>*Department of Chemistry and Biochemistry, University of California San Diego, 9500 Gilman Drive, La Jolla, CA 92093, USA*

\*Corresponding author (email: wz6034@yahoo.com)

#### Contents:

| Data Set | Description                                                                                | Pages  |
|----------|--------------------------------------------------------------------------------------------|--------|
| #1       | Result summary for screening of four separation techniques for liposome free drug analysis | 2-3    |
| #2       | Data and SEC sample extraction procedure for method development                            | 4-12   |
| #3       | Method qualification data                                                                  | 13- 24 |

**Supplement Data Set #1: Result Summary for Screening of Four Separation Techniques**  
**for Liposome Free Drug Analysis**

Four separation techniques, UF, SPE cartridge, HPLC-nPEC, and SEC cartridge, were evaluated individually for their feasibility in determining free drug in liposome formulation samples. Passive loading formulations (MR220406 and MR220520) and active loading formulations (09122201 and 10182201F) were used for free drug testing and recovery study. The results are summarized in Table 1.

**Table 1.** Free drug and recovery study results for liposome samples studied during technique screening.

| Technique       | Sample <sup>b</sup> | Free drug <sup>c</sup> | Recovery for free drug spiked |
|-----------------|---------------------|------------------------|-------------------------------|
| UF <sup>a</sup> | MR220406            | 1.8% to 5.1%           | 22.9% to 48.3% (spiked at 5%) |
| SPE cartridge   | MR220520            | 41.4% (n=3)            | 95.0% (n=3) (spiked at 19%)   |
|                 | 09122201            | 15.8% (n=2)            | N/A                           |
| HPLC-nPEC       | MR220406            | 62.8%                  | N/A                           |
|                 | MR220520            | 62.0% (n=3)            | 98.0% (n=3) (spiked at 19%)   |
|                 | 09122201            | 8.4% (n=3)             | 99.5% (n=3) (spiked at 10%)   |
|                 | 10182201F           | 13.8% (n=2)            | N/A                           |
| SEC cartridge   | MR220520            | 25.9%                  | 78.7% (spiked at 21%)         |
|                 | 10182201F           | 9.4%                   | 95.9% (spiked at 11%)         |

a. A series of UF filters with MWCO at 3K, 10K, 30K, 50K, 100K was evaluated.

b. Each sample was diluted prior to the separation: UF (4X dilution); SPE (2X dilution), HPLC-nPEC (10X dilution); SEC (2X and 5X dilution of liposome sample for non-spike and spike sample preparation)

c. Not all samples were available for initial screening of each technique. The number of sample preparations was not controlled when the pre-development screening experiments were performed on different dates.

Poor recoveries (23-48%) for free drug were obtained using UF filters with MWCO from 3K to 100K for separation of a spiked sample of MR220406. It is likely that drug adsorption and clogging of MWCO filter pores by liposomes or lipid-related species happened to the UF filter, generating the significantly underestimated free drug test results (2-5%). On the contrary, extremely high free drug results (62-63%)

were generated from HPLC-nPEC analysis of MR220406 and MR220520 samples that were produced using a similar passive loading procedure. Whether such high free drug results in passive loading liposome samples were real remained a question to answer. Although HPLC-nPEC is the most efficient separation and quantitation technique for on-line liposome free drug analysis with good free drug recovery (See. Fig. 1), high shear force due to instrument and column backpressure would be one of major factors to be concerned with for reliable liposome free drug determination. It was observed in our lab that HPLC-nPEC separation of several active loading formulation samples under high pump pressure (36 bar) generated much higher free drug test results (21-24%) than those (8-9%) determined under normal pressure (20 bar). The difference in free drug test results did exist for active formulations analyzed using SPE, HPLC-nPEC, and SEC techniques, but it was not as significant as those observed in passive loading formulations. Both SPE and SEC cartridge techniques exhibited good potential for reliably analyzing free drug in liposomes.

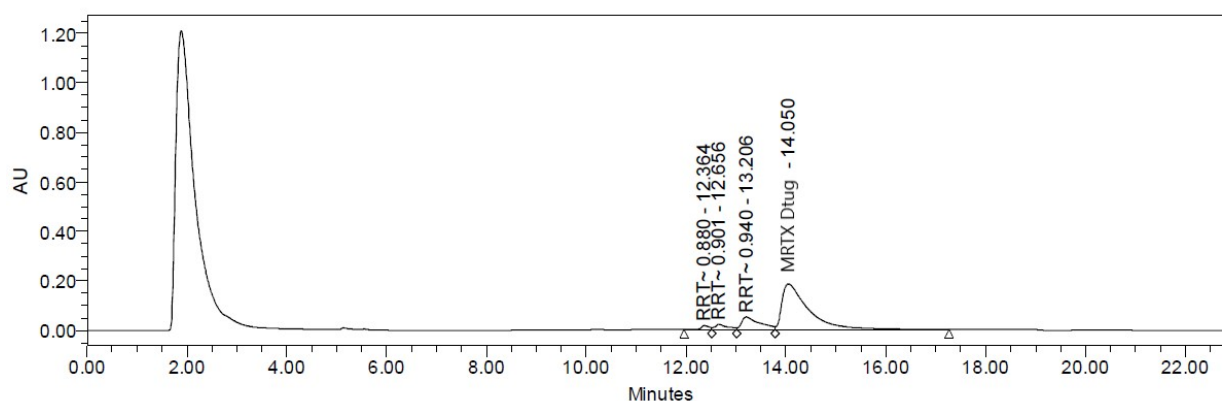

Fig. 1. An example chromatogram of liposome sample solution separated by HPLC-nPEC

Notebook reference: NB0073-011, -017, 034, -037, -038, -047, and -059

## Supplement Data Set#2 for SEC Method Development

### 1) SEC cartridge free drug retention capacity

**Table 1.** Free drug retention capacity evaluation for a Zebra Spin Desalting SEC cartridge column (7K MWCO\_2ML)

API Sol A (178 ug/ml) prepared in 10mM sodium phosphate buffer pH 6.8

| Step# | API Study Sol A (mL) | Accumulative Drug Sol Added to SEC (mL) | Conc. of Drug in Study Solution (µg/mL) | Accumulative Drug Loaded to SEC (µg) | Centrifugation <sup>a</sup> | Drug Found (µg/mL) in Elution Sample <sup>b</sup> | Eluted Drug Amount (µg) <sup>c</sup> | %Eluted Drug. <sup>d</sup> |
|-------|----------------------|-----------------------------------------|-----------------------------------------|--------------------------------------|-----------------------------|---------------------------------------------------|--------------------------------------|----------------------------|
| 1     | 0.5                  | 0.5                                     | 178                                     | 89                                   | Yes                         | 0.000                                             | 0.00                                 | 0.00                       |
| 2     | 0.5                  | 1                                       | 178                                     | 178                                  | Yes                         | 0.000                                             | 0.00                                 | 0.00                       |
| 3     | 0.5                  | 1.5                                     | 178                                     | 267                                  | Yes                         | 0.000                                             | 0.00                                 | 0.00                       |
| 4     | 0.5                  | 2                                       | 178                                     | 356                                  | Yes                         | 0.000                                             | 0.00                                 | 0.00                       |
| 5     | 0.5                  | 2.5                                     | 178                                     | 445                                  | Yes                         | 0.000                                             | 0.00                                 | 0.00                       |
| 6     | 0.5                  | 3                                       | 178                                     | 534                                  | Yes                         | 2.199                                             | 1.10                                 | 0.21                       |
| 7     | 0.5                  | 3.5                                     | 178                                     | 623                                  | Yes                         | 5.774                                             | 2.89                                 | 0.46                       |
| 8     | 0.5                  | 4                                       | 178                                     | 712                                  | Yes                         | 11.123                                            | 5.56                                 | 0.78                       |
| 9     | 0.5                  | 4.5                                     | 178                                     | 801                                  | Yes                         | 14.386                                            | 7.19                                 | 0.90                       |
| 10    | 0.5                  | 5                                       | 178                                     | 890                                  | Yes                         | 16.522                                            | 8.26                                 | 0.93                       |
| 11    | 0.5                  | 5.5                                     | 178                                     | 979                                  | Yes                         | 22.165                                            | 11.08                                | 1.13                       |
| 12    | 0.5                  | 6                                       | 178                                     | 1068                                 | Yes                         | 26.094                                            | 13.05                                | 1.22                       |
| 13    | 0.5                  | 6.5                                     | 178                                     | 1157                                 | Yes                         | 31.045                                            | 15.52                                | 1.34                       |
| 14    | 0.5                  | 7                                       | 178                                     | 1246                                 | Yes                         | 38.622                                            | 19.31                                | 1.55                       |
| 15    | 0.5                  | 7.5                                     | 178                                     | 1335                                 | Yes                         | 44.436                                            | 22.22                                | 1.66                       |
| 16    | 0.5                  | 8                                       | 178                                     | 1424                                 | Yes                         | 56.462                                            | 28.23                                | 1.98                       |
| 17    | 0.5                  | 8.5                                     | 178                                     | 1513                                 | Yes                         | 64.774                                            | 32.39                                | 2.14                       |
| 18    | 0.5                  | 9                                       | 178                                     | 1602                                 | Yes                         | 76.053                                            | 38.03                                | 2.37                       |
| 19    | 0.5                  | 9.5                                     | 178                                     | 1691                                 | Yes                         | 87.817                                            | 43.91                                | 2.60                       |
| 20    | 0.5                  | 10                                      | 178                                     | 1780                                 | Yes                         | 101.160                                           | 50.58                                | 2.84                       |

a. Eppendorf 5804R centrifuge (1250RCF/20C/3 min for spinning a test solution at each step)

b. Collected elution sample from each step (0.5 mL) and analyzed by UPLC

c. Eluted Drug Amount = Conc. of Drug (elution sample at each step) X 0.5mL

d. %Eluted Drug = [Eluted Drug Amount (Each Step) / Accumulative Drug (n)] x 100

Notebook reference: NB0212-002

## 2) SEC cartridge free drug elution (API solution as a study sample)

SEC cartridge elution procedure:

| Stage                | Eluent Step                               | Centrifuge Conditions     |
|----------------------|-------------------------------------------|---------------------------|
| 1) Conditioning      | 1) Internal storage solution (1.5 mL)     | 1250 rcf, 20°C, 3 min     |
|                      | 2) 1.0 mL 10mM sodium phosphate BF pH 6.8 | 1250 rcf, 20°C, 3 min     |
| 2) Liposome Elution  | 3) 250 µL study API solution              | 1250 rcf, 20°C, 3 min     |
|                      | 4) 1.0 mL 10mM sodium phosphate BF pH 6.8 | 1250 rcf, 20°C, 3 min     |
| 3) Free Drug Elution | 5) 1.5 mL 9/1 EtOH / 18mM HCl             | 1250 rcf, 20°C, 3 min     |
|                      | 6) 1.5 mL 9/1 EtOH / 18mM HCl             | 1250 rcf, 20°C, 3 × 3 min |
|                      | 7) 1.5 mL 9/1 EtOH / 18mM HCl             | 1250 rcf, 20°C, 3 × 3 min |
|                      | 8) 1.5 mL 9/1 EtOH / 18mM HCl             | 1250 rcf, 20°C, 3 × 3 min |
|                      | 9) 1.5 mL 9/1 EtOH / 18mM HCl             | 1250 rcf, 20°C, 3 × 3 min |

An individual elution sample from a conditioned SEC cartridge was collected in a 15-mL centrifuge tube at each step from sample-loading/BF wash step to 5-step organic media wash. For eluted free drug analysis by UPLC, diluted each collected elution sample with 17 mM HEPES BF pH6.8 according to the following scheme:

| Elution sample collected from | Final dilution volume |
|-------------------------------|-----------------------|
| Sample loading / BF wash      | No dilution           |
| Organic wash#1                | 5mL                   |
| Organic wash#2                | 5mL                   |
| Organic wash#3                | 3mL                   |
| Organic wash#4                | 3mL                   |
| Organic wash#5                | 3mL                   |

Notebook reference: NB0073-100

### 3) SEC cartridge conditioning study

3-consecutive extraction / separation of 0.25 mL of formulation sample solution (1:1) and subsequent eluted liposome samples for free drug analysis using SEC cartridges conditioned with following agents:

- 10mM sodium phosphate buffer pH 6.8
- sodium phosphate buffer and human albumin solution 10% (HAS)
- sodium phosphate buffer and formulation placebo

General SEC cartridge elution procedure:

| Stage                | Eluent Step                               | Centrifuge Conditions |
|----------------------|-------------------------------------------|-----------------------|
| 1) Conditioning      | 1) Internal storage solution (1.5 mL)     | 1250 rcf, 20°C, 3 min |
|                      | 2) 1.0 mL 10mM sodium phosphate BF pH 6.8 | 1250 rcf, 20°C, 3 min |
|                      | 3) 0.5 mL conditioning agent (n = 3)*     | 1250 rcf, 20°C, 3 min |
| 2) Liposome Elution  | 1) 250 µL sample solution**               | 1250 rcf, 20°C, 3 min |
|                      | 2) 1.0 mL 10mM sodium phosphate BF pH 6.8 | 1250 rcf, 20°C, 3 min |
|                      | 3) 1.0 mL 10mM sodium phosphate BF pH 6.8 | 1250 rcf, 20°C, 3 min |
| 3) Free Drug Elution | 1) 1.5 mL 9/1 EtOH / 18mM HCl             | 1250 rcf, 20°C, 3 min |
|                      | 2) 1.5 mL 9/1 EtOH / 18mM HCl             | 1250 rcf, 20°C, 3 min |
|                      | 3) 1.5 mL 9/1 EtOH / 18mM HCl             | 1250 rcf, 20°C, 3 min |
|                      | 4) 1.5 mL 9/1 EtOH / 18mM HCl             | 1250 rcf, 20°C, 9 min |

\*Described in the tables below for cartridge conditioning study.

\*\*For the initial SEC extraction (1<sup>st</sup> SEC): 0.25 mL of each diluted formulation sample solution (1:1 (v/v) dilution with 10mM sodium phosphate buffer pH 6.8); For the 2<sup>nd</sup> extraction: approximate 0.25 mL of liposome elution sample collected from the 1<sup>st</sup> SEC extraction; For the 3<sup>rd</sup> extraction: approximate 0.25 mL of liposome elution sample collected from the 2<sup>nd</sup> SEC extraction. Each of the three consecutive extractions was performed using a freshly conditioned SEC cartridge under the same conditions listed above.

SEC cartridges conditioned with **10mM sodium phosphate buffer pH 6.8:**

| Stage           | Eluent Step*                              | Centrifuge Conditions |
|-----------------|-------------------------------------------|-----------------------|
| 1) Conditioning | 1) Internal storage solution (1.5 mL)     | 1250 rcf, 20°C, 3 min |
|                 | 2) 1.0 mL 10mM sodium phosphate BF pH 6.8 | 1250 rcf, 20°C, 3 min |
|                 | 3) 1.0 mL 10mM sodium phosphate BF pH 6.8 | 1250 rcf, 20°C, 3 min |

\*See general elution procedure for liposomal drug and free drug elution.

SEC cartridges conditioned with **10mM sodium phosphate buffer pH 6.8 + HAS:**

| Stage           | Eluent Step*                              | Centrifuge Conditions |
|-----------------|-------------------------------------------|-----------------------|
| 1) Conditioning | 1) Internal storage solution (1.5 mL)     | 1250 rcf, 20°C, 3 min |
|                 | 2) 1.0 mL 10mM sodium phosphate BF pH 6.8 | 1250 rcf, 20°C, 3 min |
|                 | 3) 0.5 mL HAS                             | 1250 rcf, 20°C, 3 min |
|                 | 4) 0.5 mL HAS                             | 1250 rcf, 20°C, 3 min |
|                 | 5) 0.5 mL HAS                             | 1250 rcf, 20°C, 3 min |

\*See general elution procedure for liposomal drug and free drug elution.

SEC cartridges conditioned with **10mM sodium phosphate buffer pH 6.8 + Placebo:**

| Stage           | Eluent Step*                              | Centrifuge Conditions |
|-----------------|-------------------------------------------|-----------------------|
| 1) Conditioning | 1) Internal storage solution (1.5 mL)     | 1250 rcf, 20°C, 3 min |
|                 | 2) 1.0 mL 10mM sodium phosphate BF pH 6.8 | 1250 rcf, 20°C, 3 min |
|                 | 3) 0.5 mL Placebo                         | 1250 rcf, 20°C, 3 min |
|                 | 4) 0.5 mL Placebo                         | 1250 rcf, 20°C, 3 min |
|                 | 5) 0.5 mL Placebo                         | 1250 rcf, 20°C, 3 min |

\*See general elution procedure for liposomal drug and free drug elution.

For free drug analysis by UPLC, each of three free drug elution samples for a formulation sample through three consecutive extractions was diluted to volume (10-mL) in a 15-mL centrifuge tube with 17 mM HEPES buffer pH 6.8 as per method.

Notebook reference: NB0073-093

#### 4) Buffer wash steps for liposomal drug elution

SEC cartridge elution procedure:

| Stage                                  | Eluent Step                                  | Centrifuge Conditions |
|----------------------------------------|----------------------------------------------|-----------------------|
| 1) Conditioning                        | 1) Internal storage solution (1.5 mL)        | 1250 rcf, 20°C, 3 min |
|                                        | 2) 1.0 mL 10mM sodium phosphate BF pH 6.8    | 1250 rcf, 20°C, 3 min |
|                                        | 3) 0.5 mL Placebo                            | 1250 rcf, 20°C, 3 min |
|                                        | 4) 0.5 mL Placebo                            | 1250 rcf, 20°C, 3 min |
|                                        | 5) 0.5 mL Placebo                            | 1250 rcf, 20°C, 3 min |
| 2) Liposomal Drug Elution <sup>b</sup> | 1) 250 µL sample solution (1:1) <sup>a</sup> | 1250 rcf, 20°C, 3 min |
|                                        | 2) 1.0 mL 10mM sodium phosphate BF pH 6.8    | 1250 rcf, 20°C, 3 min |
|                                        | 3) 1.0 mL 10mM sodium phosphate BF pH 6.8    | 1250 rcf, 20°C, 3 min |
|                                        | 4) 1.0 mL 10mM sodium phosphate BF pH 6.8    | 1250 rcf, 20°C, 3 min |
|                                        | 5) 1.0 mL 10mM sodium phosphate BF pH 6.8    | 1250 rcf, 20°C, 3 min |
| 3) Free Drug Elution <sup>c</sup>      | 1) 1.5 mL 9/1 EtOH / 18mM HCl                | 1250 rcf, 20°C, 3 min |
|                                        | 2) 1.5 mL 9/1 EtOH / 18mM HCl                | 1250 rcf, 20°C, 3 min |
|                                        | 3) 1.5 mL 9/1 EtOH / 18mM HCl                | 1250 rcf, 20°C, 6 min |
|                                        | 4) 1.5 mL 9/1 EtOH / 18mM HCl                | 1250 rcf, 20°C, 9 min |

a. Sample solution (1:1) was prepared from the equal volume mixing of a formulation sample with 10 mM sodium phosphate BF pH 6.8 (1:1 (v/v)).

b. An individual liposome elution sample was collected in a 15-mL centrifuge tube at each step during the sample loading and four buffer wash steps. For encapsulated drug analysis by UPLC, added 6.9 mL of 9/1 IPA/18mM HCl (v/v) to each centrifuge tube, diluted to volume (10-mL) with 17mM HEPES BF pH 6.8, then incubated at 60°C for 20min to disintegrate the liposomes and dissolve the released drug.

c. All elution samples from 4-step organic media wash were collected in a 15-mL centrifuge tube. For free drug analysis by UPLC, diluted free drug elution sample in the centrifuge tube to volume (10-mL) with 17mM HEPES BF pH 6.8.

Notebook reference: NB0224-001



## 5) Organic media wash steps for liposome free drug elution

SEC cartridge elution procedure:

| Stage                                  | Eluent Step                                  | Centrifuge Conditions |
|----------------------------------------|----------------------------------------------|-----------------------|
| 1) Conditioning                        | 1) Internal storage solution (1.5 mL)        | 1250 rcf, 20°C, 3 min |
|                                        | 2) 1.0 mL 10mM sodium phosphate BF pH 6.8    | 1250 rcf, 20°C, 3 min |
|                                        | 3) 0.5 mL Placebo                            | 1250 rcf, 20°C, 3 min |
|                                        | 4) 0.5 mL Placebo                            | 1250 rcf, 20°C, 3 min |
|                                        | 5) 0.5 mL Placebo                            | 1250 rcf, 20°C, 3 min |
| 2) Liposomal Drug Elution <sup>b</sup> | 1) 250 µL sample solution (1:1) <sup>a</sup> | 1250 rcf, 20°C, 3 min |
|                                        | 2) 1.0 mL 10mM sodium phosphate BF pH 6.8    | 1250 rcf, 20°C, 3 min |
|                                        | 3) 1.0 mL 10mM sodium phosphate BF pH 6.8    | 1250 rcf, 20°C, 3 min |
| 3) Free Drug Elution <sup>c</sup>      | 1) 1.5 mL 9/1 EtOH / 18mM HCl                | 1250 rcf, 20°C, 3 min |
|                                        | 2) 1.5 mL 9/1 EtOH / 18mM HCl                | 1250 rcf, 20°C, 3 min |
|                                        | 3) 1.5 mL 9/1 EtOH / 18mM HCl                | 1250 rcf, 20°C, 6 min |
|                                        | 4) 1.5 mL 9/1 EtOH / 18mM HCl                | 1250 rcf, 20°C, 9 min |

a. Sample solution (1:1) was prepared from the equal volume mixing of a formulation sample with 10 mM sodium phosphate BF pH 6.8 (1:1 (v/v)).

b. All elution samples from the sample loading and 2-step buffer wash were collected in a 15-mL centrifuge tube for encapsulated drug analysis. For encapsulated drug analysis by UPLC, added 6.9 mL of 9/1 IPA/18mM HCl (v/v) into the centrifuge tube, diluted to volume (10-mL) with 17mM HEPES BF pH 6.8, then incubated each tube at 60°C for 20min to disintegrate the liposomes and dissolve the released drug.

c. An individual elution sample was collected in a 15-mL centrifuge tube at each step during the 4-step organic media wash. For free drug analysis by UPLC, diluted each collected free drug elution sample in the centrifuge tube with 17mM HEPES BF pH 6.8) according to the following scheme:

| Free drug elution sample from | Final dilution volume |
|-------------------------------|-----------------------|
| Organic wash#1                | 5mL                   |
| Organic wash#2                | 5mL                   |
| Organic wash#3                | 3mL                   |
| Organic wash#4                | 3mL                   |

Notebook reference: NB0224-003

## 6) Sample size and dilution effects

SEC cartridge elution procedure:

| Stage                        | Eluent Step                                    | Centrifuge Conditions |
|------------------------------|------------------------------------------------|-----------------------|
| 1) Conditioning              | 1) Internal storage solution (1.5 mL)          | 1250 rcf, 20°C, 3 min |
|                              | 2) 1.0 mL 10mM sodium phosphate BF pH 6.8      | 1250 rcf, 20°C, 3 min |
|                              | 3) 0.5 mL Placebo                              | 1250 rcf, 20°C, 3 min |
|                              | 4) 0.5 mL Placebo                              | 1250 rcf, 20°C, 3 min |
|                              | 5) 0.5 mL Placebo                              | 1250 rcf, 20°C, 3 min |
| 2) Liposomal<br>Drug Elution | 1) <b>X mL</b> sample preparation <sup>a</sup> | 1250 rcf, 20°C, 3 min |
|                              | 2) 1.0 mL 10mM sodium phosphate BF pH 6.8      | 1250 rcf, 20°C, 3 min |
|                              | 3) 1.0 mL 10mM sodium phosphate BF pH 6.8      | 1250 rcf, 20°C, 3 min |
| 3) Free Drug<br>Elution      | 1) 1.5 mL 9/1 EtOH / 18mM HCl                  | 1250 rcf, 20°C, 3 min |
|                              | 2) 1.5 mL 9/1 EtOH / 18mM HCl                  | 1250 rcf, 20°C, 3 min |
|                              | 3) 1.5 mL 9/1 EtOH / 18mM HCl                  | 1250 rcf, 20°C, 6 min |
|                              | 4) 1.5 mL 9/1 EtOH / 18mM HCl                  | 1250 rcf, 20°C, 9 min |

a. X= 0.25 mL and 0.5 mL of sample solution (1:1) and 0.25mL of non-diluted sample

Collected elution samples were prepared as per method (described in this paper) for UPLC determination of encapsulated drug and free drug in each study sample.

**Table 1. Free drug test results for MRTX liposome samples analyzed using SEC Cartridge Technique (Sample size & dilution effect)**  
Each cartridge conditioned with 3×0.5 mL of correspondong Placebo (**Option#1 for free drug calculation**)

| Sample Lot# | SPL Prep. Inf.     | Prep#      | MRTX Drug         |                     |                          |
|-------------|--------------------|------------|-------------------|---------------------|--------------------------|
|             |                    |            | Free Drug (mg/mL) | Encap. Drug (mg/mL) | % Free Drug <sup>a</sup> |
| MR220520    | 0.25 ML SPL (1:1)  | P1         | 0.241             | 1.383               | 17.5                     |
|             | 0.25 ML SPL (1:1)  | P2         | 0.244             | 1.365               | 17.8                     |
|             |                    | Mean (n=2) | <b>0.243</b>      | <b>1.374</b>        | <b>17.6</b>              |
| MR220520    | 0.5 ML SPL (1:1)   | P1         | 0.163             | 1.432               | 11.4                     |
|             | 0.5 ML SPL (1:1)   | P2         | 0.158             | 1.421               | 11.1                     |
|             |                    | Mean (n=2) | <b>0.161</b>      | <b>1.427</b>        | <b>11.3</b>              |
| MR220520    | 0.25 ML SPL (NDil) | P1         | 0.170             | 1.385               | 12.2                     |
|             | 0.25 ML SPL (NDil) | P2         | 0.166             | 1.408               | 11.9                     |
|             |                    | Mean (n=2) | <b>0.168</b>      | <b>1.397</b>        | <b>12.0</b>              |
| MTI106-A1   | 0.25 ML SPL (1:1)  | P1         | 0.129             | 2.007               | 6.4                      |
|             | 0.25 ML SPL (1:1)  | P2         | 0.124             | 1.995               | 6.2                      |
|             |                    | Mean (n=2) | <b>0.127</b>      | <b>2.001</b>        | <b>6.3</b>               |
| MTI106-A1   | 0.5 ML SPL (1:1)   | P1         | 0.106             | 2.043               | 5.2                      |
|             | 0.5 ML SPL (1:1)   | P2         | 0.107             | 2.027               | 5.3                      |
|             |                    | Mean (n=2) | <b>0.107</b>      | <b>2.035</b>        | <b>5.2</b>               |
| MTI106-A1   | 0.25 ML SPL (NDil) | P1         | 0.115             | 2.006               | 5.7                      |
|             | 0.25 ML SPL (NDil) | P2         | 0.115             | 2.041               | 5.7                      |
|             |                    | Mean (n=2) | <b>0.115</b>      | <b>2.024</b>        | <b>5.7</b>               |

a. % Free drug = [(Free drug conc. / (Free drug conc. + Encap. drug conc.)) × 100 (**Option#1 calculation**)

BF = 10 mM Na-phosphate buffer pH 6.8 as a Diluent

Notebook reference: NB0224-010

**Table 2. Free drug test results for MRTX liposome samples analyzed using SEC Cartridge Technique (Sample size & dilution effect)**  
Each cartridge conditioned with 3×0.5 mL of correspondong Placebo (**Option#2 for free drug calculation**)

| Sample Lot# | SPL Prep. Inf.     | Prep#      | MRTX Drug         |                    |                          |
|-------------|--------------------|------------|-------------------|--------------------|--------------------------|
|             |                    |            | Free Drug (mg/mL) | Total Drug (mg/mL) | % Free Drug <sup>a</sup> |
| MR220520    | 0.25 ML SPL (1:1)  | P1         | 0.241             | 1.647              | 15.0                     |
|             | 0.25 ML SPL (1:1)  | P2         | 0.244             | 1.575              | 15.1                     |
|             |                    | Mean (n=2) | <b>0.243</b>      | <b>1.611</b>       | <b>15.1</b>              |
| MR220520    | 0.5 ML SPL (1:1)   | P1         | 0.163             | 1.647              | 10.1                     |
|             | 0.5 ML SPL (1:1)   | P2         | 0.158             | 1.575              | 9.8                      |
|             |                    | Mean (n=2) | <b>0.161</b>      | <b>1.611</b>       | <b>10.0</b>              |
| MR220520    | 0.25 ML SPL (NDil) | P1         | 0.170             | 1.647              | 10.6                     |
|             | 0.25 ML SPL (NDil) | P2         | 0.166             | 1.575              | 10.3                     |
|             |                    | Mean (n=2) | <b>0.168</b>      | <b>1.611</b>       | <b>10.4</b>              |
| MTI106-A1   | 0.25 ML SPL (1:1)  | P1         | 0.129             | 2.187              | 5.9                      |
|             | 0.25 ML SPL (1:1)  | P2         | 0.124             | 2.186              | 5.7                      |
|             |                    | Mean (n=2) | <b>0.127</b>      | <b>2.187</b>       | <b>5.8</b>               |
| MTI106-A1   | 0.5 ML SPL (1:1)   | P1         | 0.106             | 2.187              | 4.8                      |
|             | 0.5 ML SPL (1:1)   | P2         | 0.107             | 2.186              | 4.9                      |
|             |                    | Mean (n=2) | <b>0.107</b>      | <b>2.187</b>       | <b>4.9</b>               |
| MTI106-A1   | 0.25 ML SPL (NDil) | P1         | 0.115             | 2.187              | 5.3                      |
|             | 0.25 ML SPL (NDil) | P2         | 0.115             | 2.186              | 5.3                      |
|             |                    | Mean (n=2) | <b>0.115</b>      | <b>2.187</b>       | <b>5.3</b>               |

a. % Free drug = [(Free drug conc. / Avg. toal drug result] ×100 (**Option#2 calculation**)

BF = 10 mM Na-phosphate buffer pH 6.8 as a Diluent

Notebook reference: NB0224-010

| Table 3. Concentration data for free drug, encapsulated drug, and total drug in each sample |            |                   |                    |                      |                        |
|---------------------------------------------------------------------------------------------|------------|-------------------|--------------------|----------------------|------------------------|
| Sample Lot#                                                                                 | Prep#      | MRTX Drug (mg/mL) |                    |                      | %Recovery <sup>a</sup> |
|                                                                                             |            | Total Drug        | Conc. of Free Drug | Conc. of Encap. Drug |                        |
| MR220520 (0.25mL SPL (1:1))                                                                 | P1         | 1.647             | 0.241              | 1.383                | 100.8                  |
|                                                                                             | P2         | 1.575             | 0.244              | 1.365                | 99.9                   |
|                                                                                             | Mean (n=2) | 1.611             | 0.243              | 1.374                | 100.3                  |
| MR220520 (0.5mL SPL (1:1))                                                                  | P1         | 1.647             | 0.163              | 1.432                | 99.0                   |
|                                                                                             | P2         | 1.575             | 0.158              | 1.421                | 98.0                   |
|                                                                                             | Mean (n=2) | 1.611             | 0.161              | 1.427                | 98.5                   |
| MR220520 (0.25mL SPL (NDil))                                                                | P1         | 1.647             | 0.170              | 1.385                | 96.5                   |
|                                                                                             | P2         | 1.575             | 0.166              | 1.408                | 97.7                   |
|                                                                                             | Mean (n=2) | 1.611             | 0.168              | 1.397                | 97.1                   |
| MTI106-A1 (0.25mL SPL (1:1))                                                                | P1         | 2.187             | 0.129              | 2.007                | 97.7                   |
|                                                                                             | P2         | 2.186             | 0.124              | 1.995                | 96.9                   |
|                                                                                             | Mean (n=2) | 2.187             | 0.127              | 2.001                | 97.3                   |
| MTI106-A1 (0.5mL SPL (1:1))                                                                 | P1         | 2.187             | 0.106              | 2.043                | 98.3                   |
|                                                                                             | P2         | 2.186             | 0.107              | 2.027                | 97.6                   |
|                                                                                             | Mean (n=2) | 2.187             | 0.107              | 2.035                | 97.9                   |
| MTI106-A1 (0.25mL SPL (NDil))                                                               | P1         | 2.187             | 0.115              | 2.006                | 97.0                   |
|                                                                                             | P2         | 2.186             | 0.115              | 2.041                | 98.6                   |
|                                                                                             | Mean (n=2) | 2.187             | 0.115              | 2.024                | 97.8                   |
| a. %Recovery for Total Drug = ((Free Drug + Encap. Drug)/Avg. Total Drug] × 100             |            |                   |                    |                      |                        |

Notebook reference: NB0224-010

### **Supplement Data Set #3 for Method Qualification**

#### **1) Specificity / selectivity study**

Table 1. UPLC analysis of specificity / selectivity study solutions @ 240 nm.

| Solution                                          | Information                                                                        | Interference |
|---------------------------------------------------|------------------------------------------------------------------------------------|--------------|
| 1) L-1 standard solution                          | The lowest calibration solution (about 1.0 µg/mL), drug peak tR at 5.1 min         | N/A          |
| 2) 40/60 EtOH/H2O                                 | Diluent for calibration standard preparations                                      | Not detected |
| 3) 10 mM Sodium phosphate buffer pH 6.8           | SEC cartridge conditioning agent and diluent for sample preparations               | Not detected |
| 4) 9/1 EtOH/18mM HCl                              | Media for SEC free drug elution                                                    | Not detected |
| 5) 9/1 IPA / 18mM HCl                             | Diluent for encapsulated drug and total drug sample preparations                   | Not detected |
| 6) 17 mM HEPES buffer pH 6.8                      | Diluent for liposomal drug and free drug elution sample preparation                | Not detected |
| 7) 25 mM Ammonium acetate buffer pH 4.5           | Diluent for total drug sample preparation                                          | Not detected |
| 8) Incubated media blank                          | Mixture of 9/1 IPA / 18mM HCl and HEPES buffer used for encapsulated drug analysis | Not detected |
| 9) Placebo SEC free drug elution sample           | Free drug detection                                                                | Not detected |
| 10) Incubated placebo SEC liposome elution sample | Encapsulated drug detection                                                        | Not detected |
| 11) Placebo sample solution                       | Total drug detection                                                               | Not detected |

Notebook reference: NB0224-021 and -034

#### **Incubated media blank**

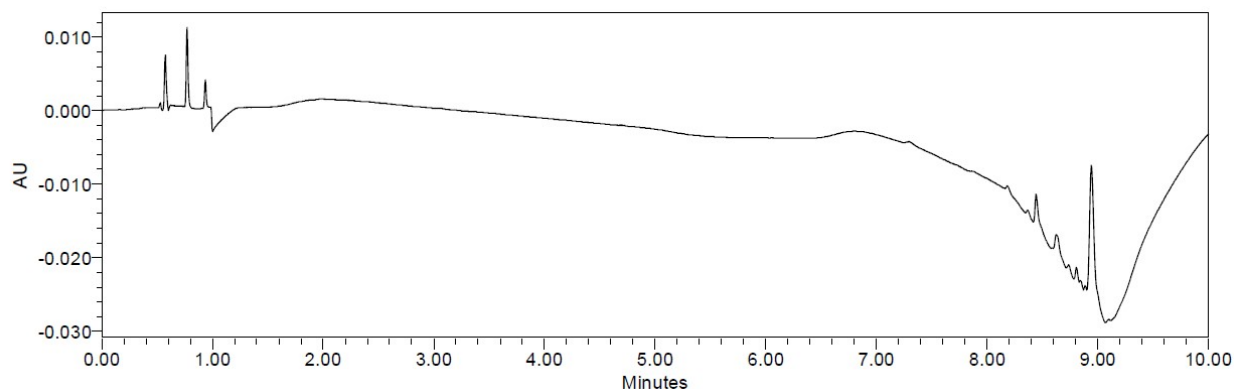

Placebo SEC free drug elution sample

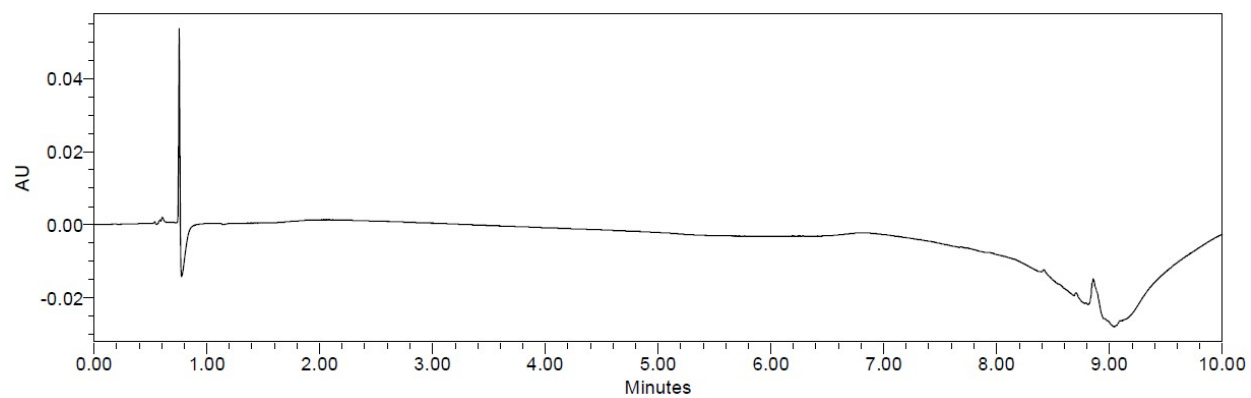

Incubated placebo SEC liposome elution sample (for encapsulated drug detection)

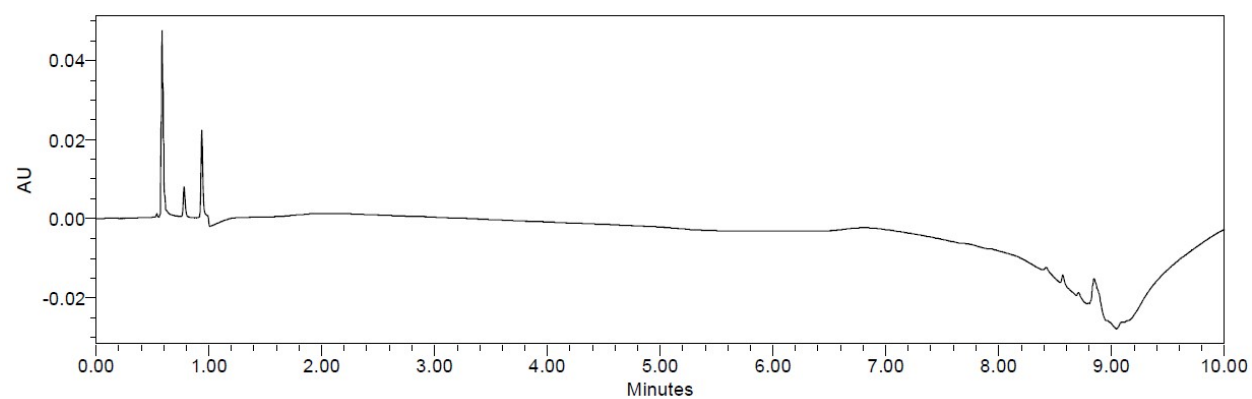

Placebo sample solution (2 $\mu$ L) (for total drug detection)

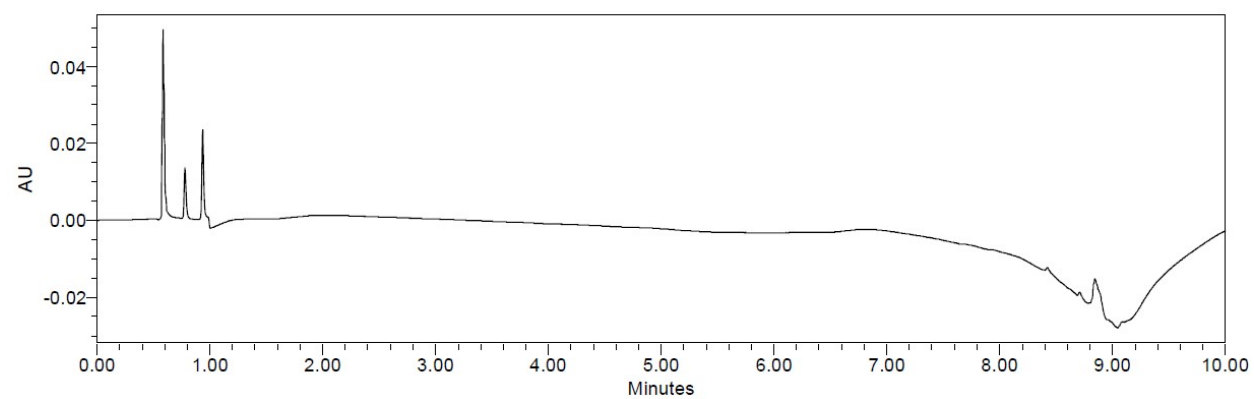

## 2) Linearity and LOQ/LOD

5-Level calibration data and plot (2µL injection @240 nm):

| Sol       | Theore. Conc. (µg/mL) | Peak Area | Calc. Conc.(µg/mL) <sup>a</sup> | Recovery (%) <sup>b</sup> |
|-----------|-----------------------|-----------|---------------------------------|---------------------------|
| L-0.5/LOQ | 0.52132               | 2641      | 0.66455                         | 127.5                     |
| L-1       | 1.04264               | 9282      | 0.99163                         | 95.1                      |
| L-2       | 2.60661               | 40815     | 2.54467                         | 97.6                      |
| L-3       | 5.21322               | 93214     | 5.12539                         | 98.3                      |
| L-4       | 10.42644              | 202003    | 10.48340                        | 100.5                     |

a. Calculate drug concentration from calibration equation according to peak area response

b. %Recovery = (Calc. Conc. / Theore. Conc.) × 100

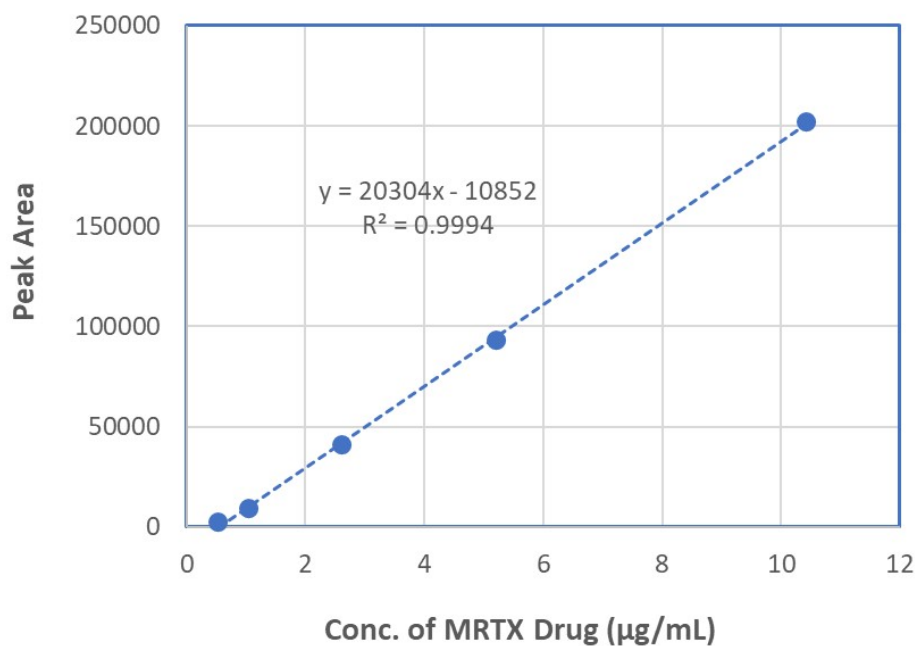

If Target drug level is set at about 5 µg/mL (L-3), % Y-Intercept =  $(10852 / 93214) \times 100 = 11.7\%$

Since the recovery at L-0.5/LOQ is 127.5%, beyond 80-120% (usually set for LOQ), calibration range would be better to set within L1 to L-4 for quantitation of drug in samples.

Notebook reference: NB0224-025

4-Level calibration data and plot (2µL injection @240 nm):

| Sol                                                                                       | Theore. Conc. (µg/mL) | Peak Area | Calc. Conc.(µg/mL) <sup>a</sup> | Recovery (%) <sup>b</sup> |
|-------------------------------------------------------------------------------------------|-----------------------|-----------|---------------------------------|---------------------------|
| L-1                                                                                       | 1.04264               | 9282      | 1.07299                         | 102.9                     |
| L-2                                                                                       | 2.60661               | 40815     | 2.60745                         | 100.0                     |
| L-3                                                                                       | 5.21322               | 93214     | 5.15727                         | 98.9                      |
| L-4                                                                                       | 10.42644              | 202003    | 10.45114                        | 100.2                     |
| a. Calculate drug concentration from calibration equation according to peak area response |                       |           |                                 |                           |
| b. %Recovery = (Calc. Conc. / Theore. Conc.) × 100                                        |                       |           |                                 |                           |

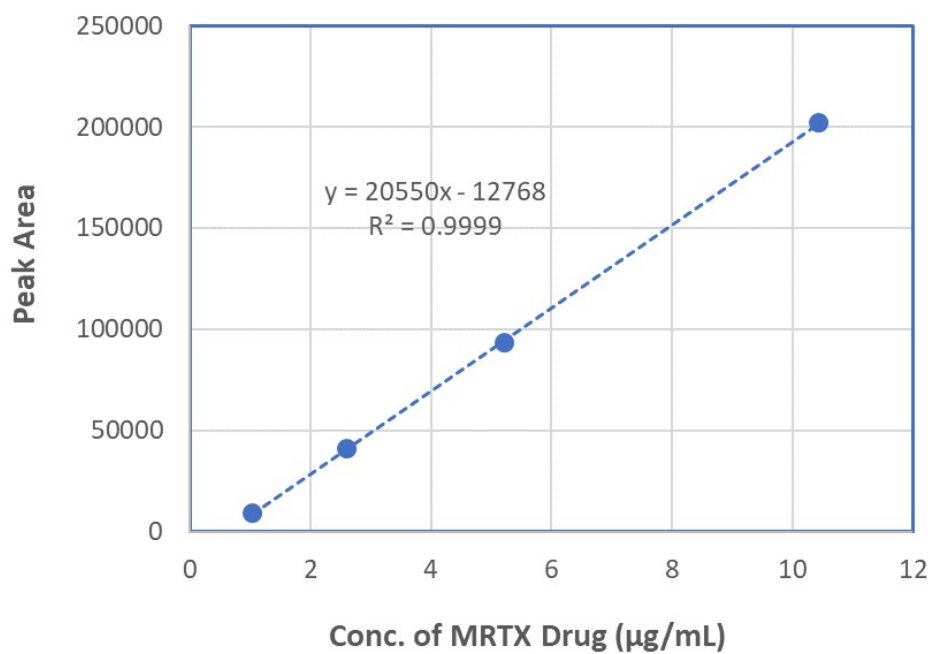

If Target drug level is set at about 5 µg/mL (L-3), % Y-Intercept =  $(12768 / 93214) \times 100 = 13.7\%$

Notebook reference: NB0224-025



6-Level calibration data and plot (2µL injection @240 nm):

| Sol | Theore. Conc. (µg/mL) | Peak Area | Calc. Conc.(µg/mL) <sup>a</sup> | Recovery (%) <sup>b</sup> |
|-----|-----------------------|-----------|---------------------------------|---------------------------|
| L-1 | 1.04264               | 9282      | 1.08558                         | 104.1                     |
| L-2 | 2.60661               | 40815     | 2.61705                         | 100.4                     |
| L-3 | 5.21322               | 93214     | 5.16192                         | 99.0                      |
| L-4 | 10.42644              | 202003    | 10.44551                        | 100.2                     |
| L-5 | 20.85288              | 414978    | 20.78912                        | 99.7                      |
| L-6 | 31.27932              | 631835    | 31.32127                        | 100.1                     |

a. Calculate drug concentration from calibration equation according to peak area response

b. %Recovery = (Calc. Conc. / Theore. Conc.) × 100

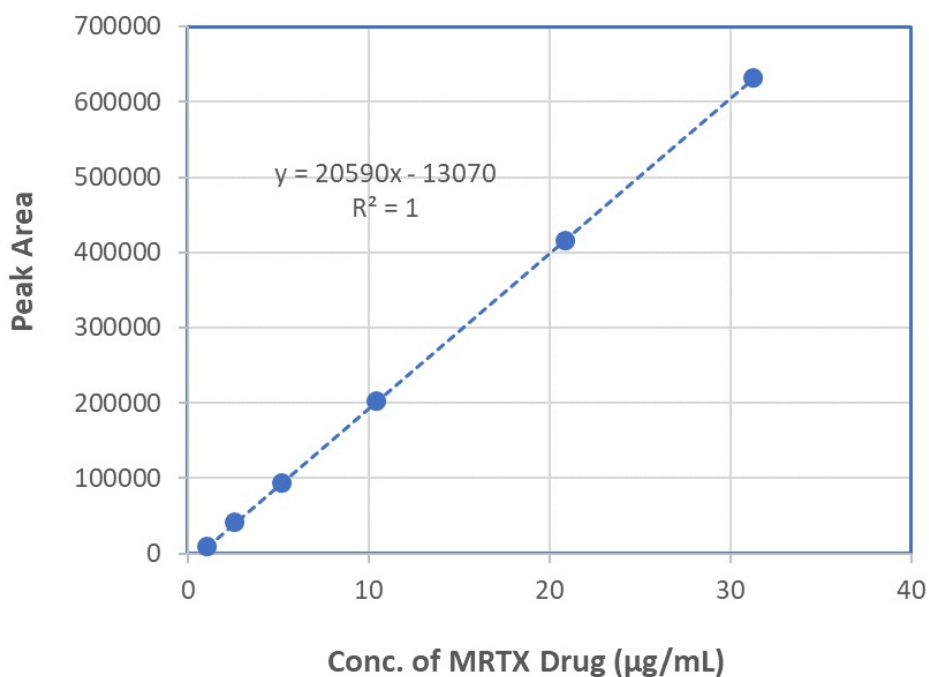

If Target drug level is set at about 5 µg/mL (L-3), % Y-Intercept =  $(13070 / 93214) \times 100 = 14.0\%$

Notebook reference: NB0224-025

7-Level calibration data and plot (2µL injection @240 nm):

| Sol | Theore. Conc. (µg/mL) | Peak Area | Calc. Conc.(µg/mL) <sup>a</sup> | Recovery (%) <sup>b</sup> |
|-----|-----------------------|-----------|---------------------------------|---------------------------|
| L-1 | 1.04264               | 9282      | 1.13352                         | 108.7                     |
| L-2 | 2.60661               | 40815     | 2.65517                         | 101.9                     |
| L-3 | 5.21322               | 93214     | 5.18371                         | 99.4                      |
| L-4 | 10.42644              | 202003    | 10.43338                        | 100.1                     |
| L-5 | 20.85288              | 414978    | 20.71061                        | 99.3                      |
| L-6 | 31.27932              | 631835    | 31.17517                        | 99.7                      |
| L-7 | 46.91898              | 960788    | 47.04898                        | 100.3                     |

a. Calculate drug concentration from calibration equation according to peak area response

b. %Recovery = (Calc. Conc. / Theore. Conc.) × 100

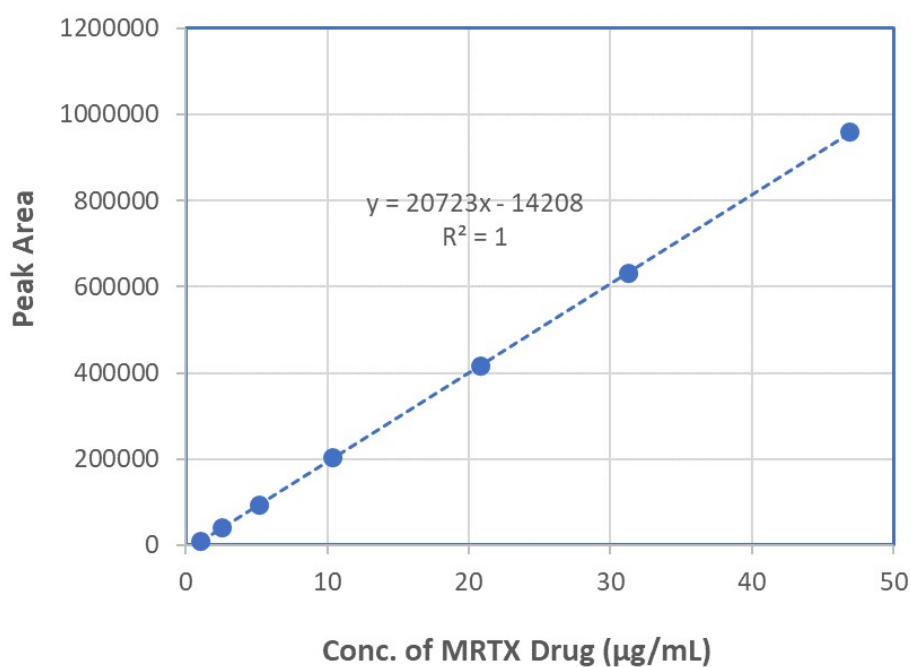

If Target drug level is set at about 5 µg/mL (L-3), % Y-Intercept =  $(14208 / 93214) \times 100 = 15.2\%$

Notebook reference: NB0224-025

Verification injection results for LOQ and LOD determination (2µL injection @240 nm):

| Injection No. | LOD Test Sol (0.177 µg/mL) |     | LOQ Test Sol (0.521 µg/mL) |      |
|---------------|----------------------------|-----|----------------------------|------|
|               | Peak Area                  | S/N | Peak Area                  | S/N  |
| 1             | 721                        | 4.8 | 2568                       | 11.6 |
| 2             | 629                        | 4.1 | 2534                       | 18.6 |
| 3             | 448                        | 3.2 | 2591                       | 17.5 |
| 4             | 397                        | 2.4 | 2597                       | 17.3 |
| 5             | 433                        | 2.5 | 2538                       | 20.6 |
| 6             | 453                        | 3.0 | 2559                       | 19.8 |
| Mean (n=6)    | 513                        | 3.3 | 2564                       | 17.6 |
| %RSD (n=6)    | 25.3                       | N/A | 1.0                        | N/A  |

Notebook reference: NB0224-025

### 3) Method accuracy / recovery

**Table 1. Accuracy/Recovery Study Result Summary for Free drug in Spiked Liposome Samples Analyzed using SEC Cartridge Technique**  
0.25 mL of liposome study sample (1:1 dilution); each cartridge conditioned with 3×0.5 mL of Placebo (NB0100-21-Pacebo)

| Sample Name                        | Prep#      | MRTX Drug         |                                          |                           |                           |
|------------------------------------|------------|-------------------|------------------------------------------|---------------------------|---------------------------|
|                                    |            | Free Drug (mg/mL) | Rec. Free Drug Drug (mg/mL) <sup>a</sup> | Spiking Free Drug (mg/mL) | Recovery (%) <sup>b</sup> |
| Non-spiked Sample (MT1106-A1)      | 1          | 0.1517            | N/A                                      | N/A                       | N/A                       |
|                                    | 2          | 0.1431            | N/A                                      | N/A                       | N/A                       |
|                                    | 3          | 0.1441            | N/A                                      | N/A                       | N/A                       |
|                                    | Mean (n=3) | 0.1463            | N/A                                      | N/A                       | N/A                       |
|                                    | %RSD (n=3) | 3.2               | N/A                                      | N/A                       | N/A                       |
| Spike Sample A (4.5% Spike level)  | 1          | 0.2230            | 0.0767                                   | 0.0999                    | 76.8                      |
|                                    | 2          | 0.2278            | 0.0815                                   | 0.0999                    | 81.6                      |
|                                    | 3          | 0.2319            | 0.0856                                   | 0.0999                    | 85.7                      |
|                                    | Mean (n=3) |                   |                                          |                           | 81.3                      |
|                                    | %RSD (n=3) |                   |                                          |                           | 5.5                       |
| Spike Sample B ( 8.9% Spike Level) | 1          | 0.3131            | 0.1668                                   | 0.1997                    | 83.5                      |
|                                    | 2          | 0.3180            | 0.1717                                   | 0.1997                    | 86.0                      |
|                                    | 3          | 0.3070            | 0.1607                                   | 0.1997                    | 80.5                      |
|                                    | Mean (n=3) |                   |                                          |                           | 83.3                      |
|                                    | %RSD (n=3) |                   |                                          |                           | 3.3                       |
| Spike Sample C (17.9% Spike Level) | 1          | 0.5141            | 0.3678                                   | 0.3995                    | 92.1                      |
|                                    | 2          | 0.4934            | 0.3471                                   | 0.3995                    | 86.9                      |
|                                    | 3          | 0.4980            | 0.3517                                   | 0.3995                    | 88.0                      |
|                                    | Mean (n=3) |                   |                                          |                           | 89.0                      |
|                                    | %RSD       |                   |                                          |                           | 3.1                       |
| Overall Mean (n=9)                 |            |                   |                                          |                           | 84.6                      |
| %RSD (n=9)                         |            |                   |                                          |                           | 5.4                       |

a. Conc. of Recovered Free Drug = Conc. of Free Drug (spiked sample) - Mean Conc. of Free Drug (non-spiked sample)

b. Recovery for Free Drug (%) = ( Conc. of Recovered Free Drug /Conc. of Spiking Free Drug) × 100

Spike Level (%) = ( Conc. of Spiking Free Drug / Total Drug in Non-Spiked Sample (2.2332 mg/mL)) × 100

**Note:** An eppendorf research plus 30-300 µL pipet (not a positive displacement) was used for sample transfer during the study.

Notebook reference: NB0224-021

**The results of accuracy/recovery study performed at CDMO lab during method evaluation:**

| <b>With Placebo Conditioning</b>                                                                                                                                                                                                                                                                                                                                                                                                                |                   |                                 |                                                     |                                          |                                                                      |                               |
|-------------------------------------------------------------------------------------------------------------------------------------------------------------------------------------------------------------------------------------------------------------------------------------------------------------------------------------------------------------------------------------------------------------------------------------------------|-------------------|---------------------------------|-----------------------------------------------------|------------------------------------------|----------------------------------------------------------------------|-------------------------------|
| <b>MTI108-A</b>                                                                                                                                                                                                                                                                                                                                                                                                                                 | <b>Replicate#</b> | <b>Measured Free,<br/>µg/mL</b> | <b>DF</b>                                           | <b>Free drug,<br/>µg/mL <sup>a</sup></b> | <b>N/A</b>                                                           |                               |
| Unspiked                                                                                                                                                                                                                                                                                                                                                                                                                                        | 1                 | 2.5037                          | 80                                                  | 200.30                                   |                                                                      |                               |
|                                                                                                                                                                                                                                                                                                                                                                                                                                                 | 2                 | 2.5950                          | 80                                                  | 207.60                                   |                                                                      |                               |
|                                                                                                                                                                                                                                                                                                                                                                                                                                                 | 3                 | 2.5502                          | 80                                                  | 204.02                                   |                                                                      |                               |
|                                                                                                                                                                                                                                                                                                                                                                                                                                                 | <b>Avg.</b>       | <b>2.55</b>                     | N/A                                                 | <b>203.97</b>                            |                                                                      |                               |
|                                                                                                                                                                                                                                                                                                                                                                                                                                                 | <b>RSD (%)</b>    | <b>1.8</b>                      |                                                     | <b>1.8</b>                               |                                                                      |                               |
| Spiked with<br>10% API                                                                                                                                                                                                                                                                                                                                                                                                                          | <b>Replicate#</b> | <b>Measured Free,<br/>µg/mL</b> | <b>Recovered Spiked<br/>API, µg/mL <sup>b</sup></b> | <b>DF</b>                                | <b>Recovered Spiked<br/>API as Free drug,<br/>µg/mL <sup>c</sup></b> | <b>%Recovery <sup>d</sup></b> |
|                                                                                                                                                                                                                                                                                                                                                                                                                                                 | 1                 | 7.0182                          | 4.4686                                              | 40                                       | 178.74                                                               | 89.4                          |
|                                                                                                                                                                                                                                                                                                                                                                                                                                                 | 2                 | 6.9834                          | 4.4338                                              | 40                                       | 177.35                                                               | 88.7                          |
|                                                                                                                                                                                                                                                                                                                                                                                                                                                 | 3                 | 6.8935                          | 4.3439                                              | 40                                       | 173.75                                                               | 86.9                          |
|                                                                                                                                                                                                                                                                                                                                                                                                                                                 | <b>Avg.</b>       | <b>6.97</b>                     | <b>4.42</b>                                         | N/A                                      | <b>176.62</b>                                                        | <b>88.3</b>                   |
|                                                                                                                                                                                                                                                                                                                                                                                                                                                 | <b>RSD (%)</b>    | <b>0.9</b>                      | <b>1.5</b>                                          |                                          | <b>1.5</b>                                                           | <b>1.5</b>                    |
|                                                                                                                                                                                                                                                                                                                                                                                                                                                 |                   |                                 |                                                     |                                          |                                                                      |                               |
| <b>With Placebo Conditioning</b>                                                                                                                                                                                                                                                                                                                                                                                                                |                   |                                 |                                                     |                                          |                                                                      |                               |
| <b>MTI108-B</b>                                                                                                                                                                                                                                                                                                                                                                                                                                 | <b>Replicate#</b> | <b>Measured Free,<br/>µg/mL</b> | <b>DF</b>                                           | <b>Free drug,<br/>µg/mL <sup>a</sup></b> | <b>N/A</b>                                                           |                               |
| Unspiked                                                                                                                                                                                                                                                                                                                                                                                                                                        | 1                 | 2.4964                          | 80                                                  | 199.71                                   |                                                                      |                               |
|                                                                                                                                                                                                                                                                                                                                                                                                                                                 | 2                 | 2.5238                          | 80                                                  | 201.90                                   |                                                                      |                               |
|                                                                                                                                                                                                                                                                                                                                                                                                                                                 | 3                 | 2.5492                          | 80                                                  | 203.94                                   |                                                                      |                               |
|                                                                                                                                                                                                                                                                                                                                                                                                                                                 | <b>Avg.</b>       | <b>2.52</b>                     | N/A                                                 | <b>201.85</b>                            |                                                                      |                               |
|                                                                                                                                                                                                                                                                                                                                                                                                                                                 | <b>RSD (%)</b>    | <b>1.0</b>                      |                                                     | <b>1.0</b>                               |                                                                      |                               |
| Spiked with<br>10% API                                                                                                                                                                                                                                                                                                                                                                                                                          | <b>Replicate#</b> | <b>Measured Free,<br/>µg/mL</b> | <b>Recovered Spiked<br/>API, µg/mL <sup>b</sup></b> | <b>DF</b>                                | <b>Recovered Spiked<br/>API as Free drug,<br/>µg/mL <sup>c</sup></b> | <b>%Recovery <sup>d</sup></b> |
|                                                                                                                                                                                                                                                                                                                                                                                                                                                 | 1                 | 7.3209                          | 4.7978                                              | 40                                       | 191.91                                                               | 96.0                          |
|                                                                                                                                                                                                                                                                                                                                                                                                                                                 | 2                 | 7.3173                          | 4.7942                                              | 40                                       | 191.77                                                               | 95.9                          |
|                                                                                                                                                                                                                                                                                                                                                                                                                                                 | 3                 | 7.4021                          | 4.8790                                              | 40                                       | 195.16                                                               | 97.6                          |
|                                                                                                                                                                                                                                                                                                                                                                                                                                                 | <b>Avg.</b>       | <b>7.35</b>                     | <b>4.82</b>                                         | N/A                                      | <b>192.95</b>                                                        | <b>96.5</b>                   |
|                                                                                                                                                                                                                                                                                                                                                                                                                                                 | <b>RSD (%)</b>    | <b>0.7</b>                      | <b>1.0</b>                                          |                                          | <b>1.0</b>                                                           | <b>1.0</b>                    |
|                                                                                                                                                                                                                                                                                                                                                                                                                                                 |                   |                                 |                                                     |                                          |                                                                      |                               |
| a. Free Drug in formulation sample = Measured Free (Unspiked sample sol) × Sample dilution factor (DF)<br>b. Recovered spiked API (spiked sample solution) = Meas. Free (Spiked sample sol) - Avg. Meas. Free (Unspiked sample sol)<br>c. Recovered Spiked API as Free Drug = Recovered Spiked API (Spike sample sol) × Dilution factor (DF)<br>d. %Recovery = (Recovered Spiked API as Free Drug / Theoret. Spiking API Conc. (200µg/mL)) ×100 |                   |                                 |                                                     |                                          |                                                                      |                               |

**Note:** A positive displacement pipet was used to load each study sample solution to a SEC cartridge.

#### 4) Method precision

**Table 1. Six Replicate Determinations of Free Drug in MTI106-A1 (non-spike sample) for Method Precision Study (SEC Cartridge Technique)**  
0.25 mL of diluted liposome sample solution (1:1); each cartridge conditioned with 3x0.5 mL of Placebo (NB0100-21-Placebo)

| (Option#1 calculation for both free drug and encap. drug) |       |                   |                     |                            |                              |
|-----------------------------------------------------------|-------|-------------------|---------------------|----------------------------|------------------------------|
| Sample Lot#                                               | Prep# | MRTX Drug         |                     |                            |                              |
|                                                           |       | Free Drug (mg/mL) | Encap. Drug (mg/mL) | Free Drug (%) <sup>a</sup> | Encap. Drug (%) <sup>b</sup> |
| MTI106-A1                                                 | 1     | 0.1488            | 2.1024              | 6.6                        | 93.4                         |
|                                                           | 2     | 0.1429            | 2.1226              | 6.3                        | 93.7                         |
|                                                           | 3     | 0.1382            | 2.0729              | 6.3                        | 93.7                         |
|                                                           | 4     | 0.1403            | 2.0670              | 6.4                        | 93.6                         |
|                                                           | 5     | 0.1342            | 2.1031              | 6.0                        | 94.0                         |
|                                                           | 6     | 0.1338            | 2.0627              | 6.1                        | 93.9                         |
| Mean                                                      |       | 0.1397            | 2.0993              | 6.3                        | 93.7                         |
| SD                                                        |       | 0.0057            | N/A                 | 0.2                        | 0.2                          |
| %RSD                                                      |       | 4.1               | N/A                 | 3.4                        | 0.2                          |

a. % Free drug = (Free drug conc. / (Encap. drug conc. + Free drug conc.)) × 100 (Option#1 calculation)

b. % Encap. drug = (Encap. drug conc. / (Encap. drug conc. + Free drug conc.)) × 100 = 100 - %Free drug (Option#1 calculation)

**Table 2. Six Replicate Determinations of Free Drug in MTI106-A1 (non-spike sample) for Method Precision Study (SEC Cartridge Technique)**  
0.25 mL of diluted liposome sample solution (1:1); each cartridge conditioned with 3x0.5 mL of Placebo (NB0100-21-Placebo)

| (Option#2 calculation for both free drug and encap. drug) |       |                   |                    |                            |                              |
|-----------------------------------------------------------|-------|-------------------|--------------------|----------------------------|------------------------------|
| Sample Lot#                                               | Prep# | MRTX Drug         |                    |                            |                              |
|                                                           |       | Free Drug (mg/mL) | Total Drug (mg/mL) | Free Drug (%) <sup>a</sup> | Encap. Drug (%) <sup>b</sup> |
| MTI106-A1                                                 | 1     | 0.1488            | 2.2448             | 6.6                        | 93.4                         |
|                                                           | 2     | 0.1429            | 2.2494             | 6.3                        | 93.7                         |
|                                                           | 3     | 0.1382            | 2.2578             | 6.1                        | 93.9                         |
|                                                           | 4     | 0.1403            | N/A                | 6.2                        | 93.8                         |
|                                                           | 5     | 0.1342            | N/A                | 6.0                        | 94.0                         |
|                                                           | 6     | 0.1338            | N/A                | 5.9                        | 94.1                         |
| Mean                                                      |       | 0.1397            | 2.2507             | 6.2                        | 93.8                         |
| SD                                                        |       | 0.0057            | N/A                | 0.3                        | 0.3                          |
| %RSD                                                      |       | 4.1               | N/A                | 4.1                        | 0.3                          |

a. % Free drug = (Free drug conc. / Avg. total drug conc.) × 100 (Option#2 calculation)

b. % Encap. drug = 100 - %Free drug (Option#2 calculation)

**Table 3. Concentration data for free drug, encapsulated drug, and total drug in each sample**

| Sample Lot# | MRTX Drug (mg/mL) |                    |                      | %Recovery <sup>a</sup> |
|-------------|-------------------|--------------------|----------------------|------------------------|
|             | Total Drug        | Conc. of Free Drug | Conc. of Encap. Drug |                        |
| MTI106-A1   | 2.2448            | 0.1488             | 2.1024               | 100.0                  |
|             | 2.2494            | 0.1429             | 2.1226               | 100.7                  |
|             | 2.2578            | 0.1382             | 2.0729               | 98.2                   |
|             | N/A               | 0.1403             | 2.0670               | 98.1                   |
|             | N/A               | 0.1342             | 2.1031               | 99.4                   |
|             | N/A               | 0.1338             | 2.0627               | 97.6                   |
| Mean        | 2.2507            | 0.1397             | 2.0885               | 99.0                   |
| SD          | 0.0066            | 0.0057             | 0.0243               | 1.2                    |
| %RSD        | 0.3               | 4.1                | 1.2                  | 1.2                    |

a. %Recovery for Total Drug = ((Free Drug + Encap. Drug)/Avg. Total Drug) × 100

Notebook reference: NB0224-021

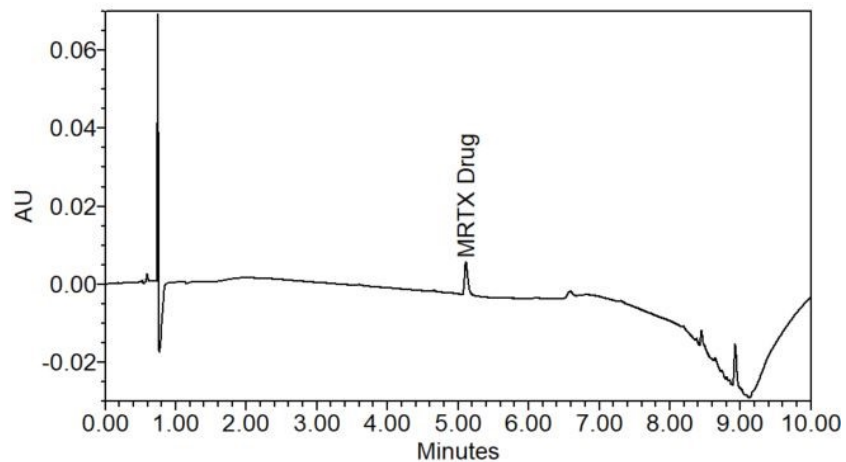

**Fig. 1:** Chromatogram of free drug sample solution (Prep#1) (Sample dilution factor: 80)

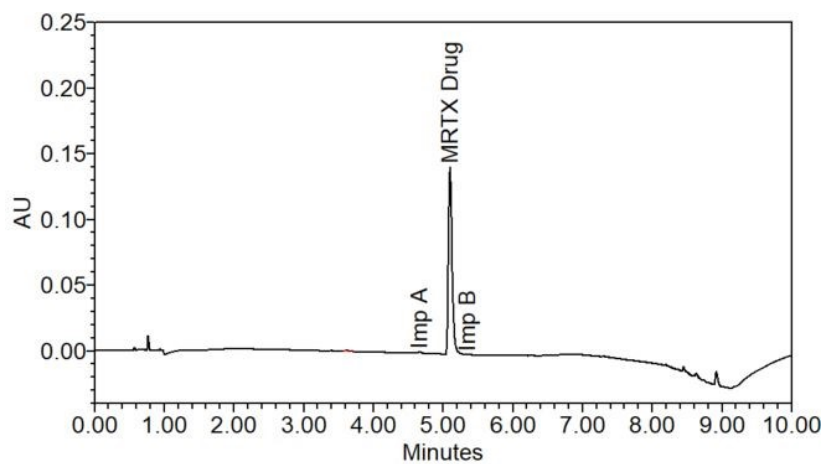

**Fig. 2:** Chromatogram of encapsulated drug sample solution (Prep#1) (Sample dilution factor: 80)

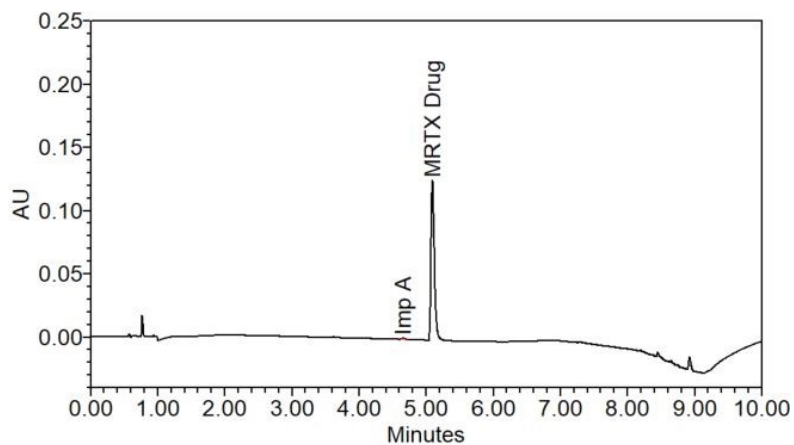

**Fig. 3:** Chromatogram of total drug sample solution (Prep#1) (Sample dilution factor: 100)

## 5) Solution stability

**Table 1. Standard Solution Stability Test Results (Stored in both flasks@2-8°C and HPLC vials@8°C)**

| Sol name | Conditions     | MRTX Drug                  |                                         |                           |
|----------|----------------|----------------------------|-----------------------------------------|---------------------------|
|          |                | Theore. Conc. (µg/mL) (t0) | Retest (µg/mL) (in 3 days) <sup>a</sup> | Recovery (%) <sup>b</sup> |
| L-1      | Flask @2-8°C   | 1.0520                     | 0.9782                                  | <b>93.0</b>               |
|          | HPLC Vial @8°C | 1.0520                     | 1.0298                                  | <b>97.9</b>               |
| L-4      | Flask @2-8°C   | 10.5204                    | 10.4813                                 | <b>99.6</b>               |
|          | HPLC Vial@8°C  | 10.5204                    | 10.4665                                 | <b>99.5</b>               |
| L-7      | Flask @2-8°C   | 47.3419                    | 46.9221                                 | <b>99.1</b>               |
|          | HPLC Vial@8°C  | 47.3419                    | 47.1736                                 | <b>99.6</b>               |

a. Determined by UPLC using freshly prepared calibration std solutions

b. % Recovery = [Result (t) /Initial result] x 100

**Table 2. Sample Solution Stability Test Results (Stored in both centrifuge tubes or flask @2-8°C and HPLC vials@8°C)**

| Sol name                 | Conditions     | MRTX Drug                 |                            |                           |
|--------------------------|----------------|---------------------------|----------------------------|---------------------------|
|                          |                | Initial Test (mg/mL) (t0) | Retest (mg/mL) (in 3 days) | Recovery (%) <sup>a</sup> |
| FD-106A1_P1 <sup>b</sup> | Tube @2-8°C    | 148.8397                  | 148.0192                   | <b>99.4</b>               |
|                          | HPLC Vial @8°C | 148.8397                  | 153.5660                   | <b>103.2</b>              |
| TD_106A1_P1 <sup>c</sup> | Flask @2-8°C   | 2244.8330                 | 2248.7588                  | <b>100.2</b>              |
|                          | HPLC Vial@8°C  | 2244.8330                 | 2241.7595                  | <b>99.9</b>               |
| LD_106A1_P1 <sup>c</sup> | Tube @2-8°C    | 2102.4137                 | 2089.4012                  | <b>99.4</b>               |
|                          | HPLC Vial@8°C  | 2102.4137                 | 2097.7905                  | <b>99.8</b>               |

a. % Recovery = [Result (t) /Initial result] × 100

b. Determined using freshly prepared L-1 to L-4 as linear calibration standards

c. Determined using freshly prepared L-1 to L-6 as linear calibration standards

FD = Free drug in MTI106-A1 sample; TD = Total drug in MTI106-A1 sample; LD = Liposomal or encapsulated drug in MTI106-A1 sample

Notebook reference: NB0224-021 and -022
